# Supplementary material
Source: ML conference proceedings conference paper supplement (https://openaccess.thecvf.com/content/CVPR2024/html/Ma_HumanNeRF-SE_A_Simple_CVPR_2024_paper.html)
Supplement: Supplementary file 1 [file Ma_HumanNeRF-SE_A_Simple_CVPR_2024_supplemental.pdf]

# HumanNeRF-SE: A Simple yet Effective Approach to Animate HumanNeRF with Diverse Poses

## Supplementary Material

### 7. Network Architecture

#### 7.1. Conv-Filter

We performed channel-by-channel single-layer convolution on the voxel volume we constructed, with convolution kernel weights initialized to one. Our convolution kernel size is 5, padding is 2, and stride is 1 to keep the volume size. Channel-by-channel convolution can preserve the semantic information of high-frequency details.

#### 7.2. Point Refine

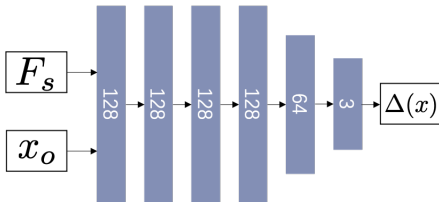

Figure 10. **Visualization of point refine network.** We use  $F_s$  and  $x_o$  as inputs to the network to obtain offsets  $\Delta(x)$  to refine the canonical coordinates after the general rigid deformation. We initialize the bias of the last layer to zero, and the weight is within the range of  $(-1e^{-5}, 1e^{-5})$ .

#### 7.3. NeRF Network

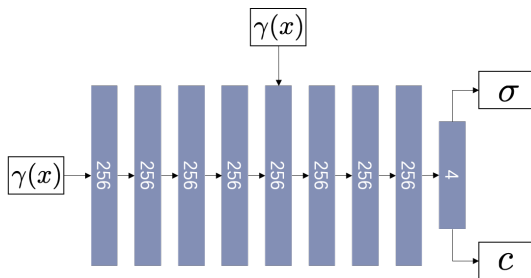

Figure 11. **Visualization of appearance network.** Follow the baseline [56], we use an 8-layer MLP with width=256, taking as input positional encoding  $\gamma$  of position  $x$  and producing color  $c$  and density  $\sigma$ . A skip connection that concatenates  $\gamma(x)$  to the fifth layer is applied. We adopt ReLU activation after each fully connected layer, except for the one generating color  $c$  where we use sigmoid.

### 8. Canonicalization

To map points in the observation space to the canonical space, our baselines utilize neural networks to learn backward warping weight fields. This method is easy to implement but suffers from poor generalization to unseen poses,

as the backward weight fields attempt to learn a spatial weight fields that deform with pose variations, necessitating memorization of weight fields for different spatial configurations. Generalizing to unseen poses using such pose-dependent weight fields is difficult. Our method directly queries the nearest SMPL’s LBS weights in an explicit voxel, which is highly efficient and generalizable. However, this method suffers from unnatural deformations when the deformation angle is too large (see Figure 8). To address this issue, we use an additional neural network to learn a residual for canonical points, which is specific to the data and empowered by point-level features, considering the different clothing of the performers.

The rotation  $R_j$  and translation  $T_j$  for the rigid deformation are represented as:

$$\begin{bmatrix} R_j & T_j \\ 0 & 1 \end{bmatrix} = \prod_{i \in p(j)} \begin{bmatrix} R(\omega_i^c) & o_i^c \\ 0 & 1 \end{bmatrix} \left\{ \prod_{i \in p(j)} \begin{bmatrix} R(\omega_i) & o_i \\ 0 & 1 \end{bmatrix} \right\}^{-1} \quad (14)$$

where  $p(j)$  is the ordered set of parents of joint  $j$  in the kinematic tree,  $\omega_i$  defines local joint rotations using axis-angle representations,  $R(\omega_i) \in \mathbb{R}^{3 \times 3}$  is the converted rotation matrix of  $\omega_i$  via the Rodrigues formula, and  $o_i$  is the  $i$ -th joint center.

### 9. Ablation Study

**Voxel Size.** In the Conv-Filter, we voxelized all coordinates, which resulted in some loss of information compared to a dense space. However, this greatly facilitated our subsequent processing and computations. We conducted ablation experiments on the voxel size used in the voxelization process, as shown in Table 4. Voxel size affects mapping granularity to get canonical points. A larger voxel size results in coarser mapping and lower image quality. In contrast, a smaller one requires a bigger convolution kernel to diffuse occupancy and more computing resources, and it did not result in higher accuracy because the prior does not perfectly match the actual human body, and clothing is also outside the prior.

**Weight Distribution.** In the main text, we discussed the importance of filtering operations. It is worth noting that previous methods did not require similar operations. Our experiments suggest that this is because the learned neural weight field assigns negative weights to irrelevant joints in the data. When we simply use *softmax* to map the neural weight field to a distribution that is the same as the SMPL

Table 4. Ablation experiment on the voxel size of our method in ZJU-MOCAP. For different subjects, there is a different optimal voxel size. We use 0.02 as voxel size in the experiment section because it has the best overall performance.

|             | PSNR $\uparrow$ | SSIM $\uparrow$ | $\dagger$ LPIPS $\downarrow$ |
|-------------|-----------------|-----------------|------------------------------|
| voxel=0.01  | 30.49           | 0.971           | 26.386                       |
| voxel=0.015 | 30.69           | 0.972           | 25.354                       |
| voxel=0.02  | 31.09 $\bullet$ | 0.974 $\bullet$ | 24.085 $\bullet$             |
| voxel=0.025 | 31.07           | 0.974 $\bullet$ | 24.705                       |
| voxel=0.03  | 30.72           | 0.973           | 25.013                       |

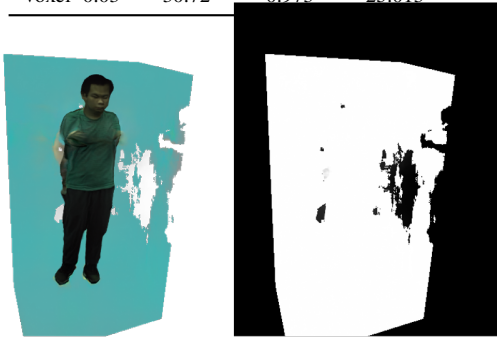

Figure 12. By mapping the learned weight field of HumanNeRF [56] to the same distribution as SMPL weight using softmax, the same phenomenon occurred.

weight,  $\sum_{j \in J} w_j = 1, w_j > 0$ , similar phenomena occur, see Figure 12.

## 10. More Results

**Quantitative experiments.** Due to the space limitation of the main text, the Figure 4 provided in the main text is the few-shot image synthesis result and Table 1 is a overall table.

Table 8, Table 9 and Table 10 are detailed data for Table 1. For ZJU-MOCAP, we use videos from the same six subjects as in previous work. For our IN-THE-WILD DATA, each subject is composed of multiple pose sequences to enable more convincing novel pose experiments. The videos are captured with a single camera, and SMPL are estimated with ROMP [50].

In order to better compare the performance of different methods, we synthesized the results using full input images. Figure 16 shows the synthesis results on ZJU-MOCAP, and Figure 15 shows the image synthesis results on the IN-THE-WILD DATA. Figure 17 directly compares the novel pose image synthesis ability of the three methods under two input conditions.

Compared with Figure 4, the defects of the baselines have been significantly improved on ZJU-MOCAP, but there are still obvious defects in these methods on IN-THE-WILD DATA. This is highly related to the data distribution.

**Pose similarity.** We found that the novel pose experimental setting in previous studies is unreasonable because the

Table 5. Pose similarity of test poses and train poses in previous novel pose experiments. The previous setting of novel pose is not novel enough because of the high similarity.

|     | Min   | Max   | Average |
|-----|-------|-------|---------|
| 377 | 0.876 | 0.997 | 0.919   |
| 386 | 0.939 | 0.995 | 0.964   |
| 387 | 0.969 | 0.996 | 0.985   |
| 392 | 0.845 | 0.957 | 0.909   |
| 393 | 0.834 | 0.998 | 0.904   |
| 394 | 0.760 | 0.993 | 0.842   |

test poses and training poses are very similar, as the characters in ZJU-MOCAP perform similar movements repeatedly. This also encourages us to use custom data and subjective research of results on poses without ground truth images. Novel poses synthesized by HumanNeRF should be sufficiently novel and easy to obtain, rather than being limited to professional laboratories.

To quantify the similarity of poses, we calculate the highest cosine similarity with all training poses for each pose in the test data. As shown in Table 5, simply dividing each subject into training and testing data in a 4:1 ratio may result in highly similar poses in the testing data being present in the training data.

In our experiments, high pose similarity does not always result in a decrease in baseline performance, because during the training process, similar poses and viewpoints are limited. For example, the pose similarity of Subject 386 is very high, but the corresponding pose only appears at the beginning and can only see the performer’s right side, so when we synthesize this highly similar pose, the performance of the baselines is not good.

**Qualitative results.** In the qualitative experiments, we drive the model to generate new pose images by using pose sequences of different performers. We make a series of image results into a video to help the human eyes better distinguish the performance of different methods. The video results are included in the supplementary materials in the form of a compressed file.

**Visual quality.** The rendering results and metrics on the ZJU-MOCAP data are 512p resolution which we followed the popular protocol in [56, 62], while on our collected IN-THE-WILD data the resolution is 1080p. Both results show our superiority over SOTAs. To validate the reliability of these scores calculated with 512p, we compare our method with HumanNeRF on frames with 2K resolution and find that we still surpass HumanNeRF, as shown in Table 6. We provide additional visual comparisons based on higher-resolution frames (Figure 13). The logo and hand show better details than HumanNeRF in both low and high resolution.

**More comparisons.** To demonstrate the excellent performance of our method in similar tasks, additional compar-

Table 6. Results on subject 392 under different resolution.

| 2k resolution | PSNR $\uparrow$ | SSIM $\uparrow$ | LPIPS $\downarrow$ | 512p resolution | PSNR $\uparrow$ | SSIM $\uparrow$ | LPIPS $\downarrow$ |
|---------------|-----------------|-----------------|--------------------|-----------------|-----------------|-----------------|--------------------|
| HumanNeRF     | 31.36           | 0.983           | 0.0318             | HumanNeRF       | <b>31.55</b>    | <b>0.975</b>    | 0.0280             |
| Ours          | <b>31.73</b>    | <b>0.984</b>    | <b>0.0314</b>      | Ours            | 31.36           | 0.973           | <b>0.0276</b>      |

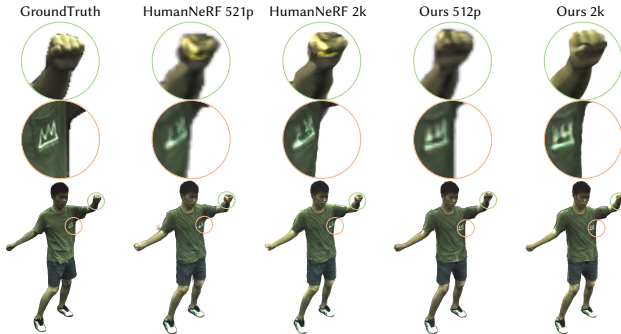

Figure 13. Results on subject 392 under different resolutions.

Table 7. Comparison with more methods. Our method has shown significant advantages in comparison with more methods.

|           | View           | Prior | PSNR $\uparrow$ | SSIM $\uparrow$ | LPIPS $\downarrow$ |              |
|-----------|----------------|-------|-----------------|-----------------|--------------------|--------------|
| THUMAN4.0 | TAVA [20]      | >1    | skeleton        | 26.607          | 0.968              | 0.032        |
|           | SLRF [67]      | 24    | nodes           | 26.152          | 0.969              | 0.024        |
|           | Posevocab [22] | 24    | SMPL            | 30.972          | 0.977              | <b>0.017</b> |
|           | Posevocab [22] | 1     | SMPL            | 27.820          | 0.973              | 0.064        |
|           | Ours           | 1     | SMPL            | <b>31.148</b>   | <b>0.979</b>       | <b>0.017</b> |
| ZJU-MOCAP | SLRF [67]      | 24    | nodes           | 23.61           | 0.905              | -            |
|           | NPC [49]       | >1    | point clouds    | 21.88           | -                  | 0.134        |
|           | SelfRecon [15] | 1     | SMPL            | 27.94           | 0.969              | 0.043        |
|           | Ours           | 1     | SMPL            | <b>29.36</b>    | <b>0.974</b>       | <b>0.022</b> |

isons with methods that incorporate explicit information are provided in Table 7.

**Dancing visualization.** In addition to using cross-subject movements in our qualitative analysis to test the model’s novel pose ability, we can also use dance movements from online videos to drive the model as presented in Figure 14.

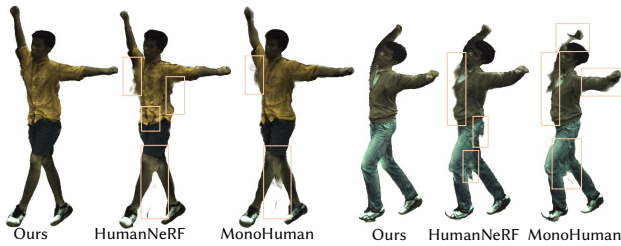

Figure 14. Dancing results. Our results are very clean compared to the blurry and unnatural results of other methods.

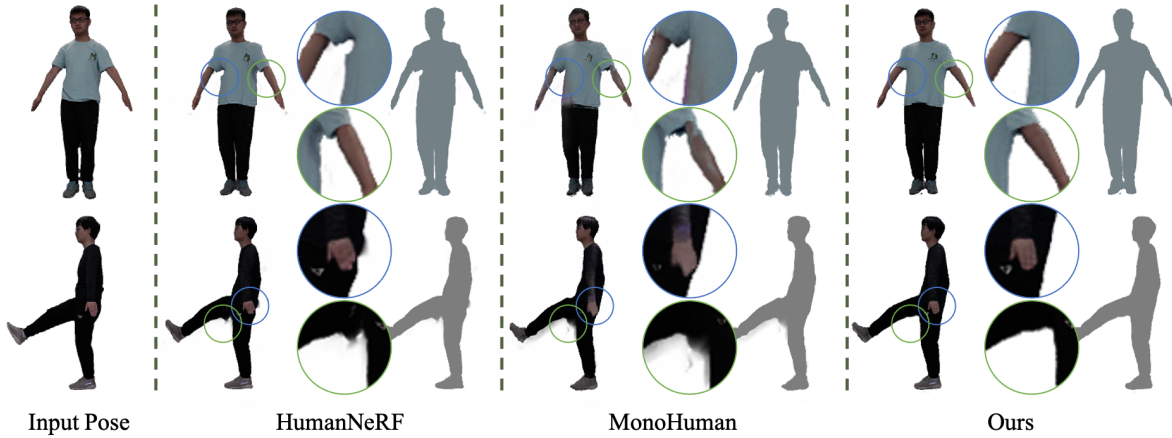

Figure 15. **Image synthesis results with full input on IN-THE-WILD DATA.** Our method maintains good performance at joint junctions, but the results of the baselines are blurry and have unnatural distortions.

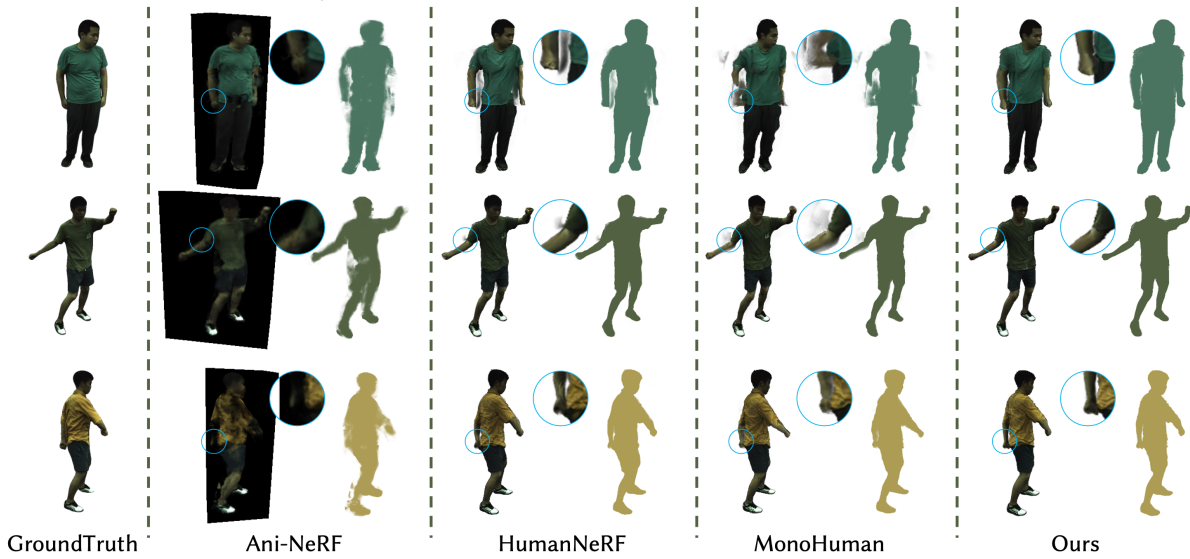

Figure 16. **Image synthesis results with full input on ZJU-MOCAP.** For Subject 386 (line 1), the baselines still have very poor image synthesis results. For Subject 392 and 393, there are still irregular deformations and artifacts in the image synthesis results, whereas our method achieves the best performance in visual comparison.

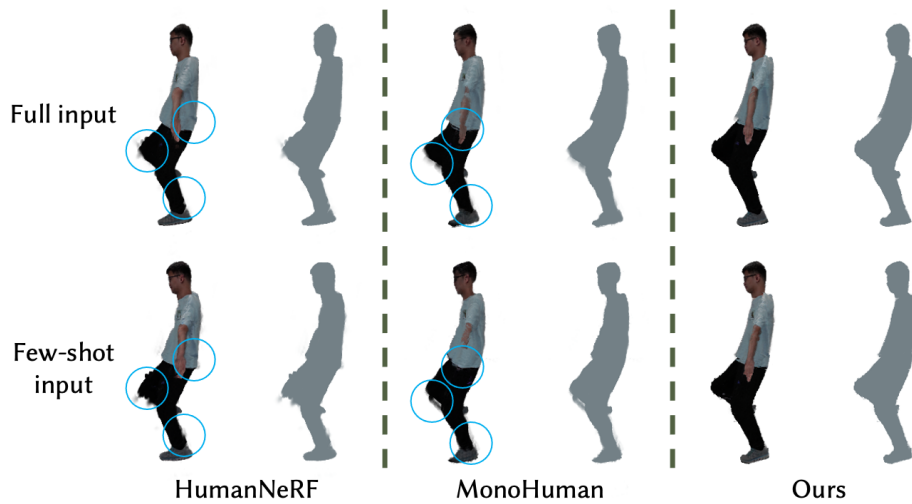

Figure 17. **Comparison between full input and few-shot input.** HumanNeRF [56] and MonoHuman [62] exhibit more artifacts and unnatural deformations with less data. MonoHuman [62] even produces hand missing. Our method maintains almost unchanged performance under the same testing conditions.

Table 8. **Comparison of full input results on ZJU-MOCAP.** Our method shows a leading advantage in LPIPS, which is aligned with human perception. Each data in the table represents the average value of all test frames’ metrics in the corresponding video, which is consistent with the previous studies.

| Methods        | Subject377 |          |          | Subject386 |          |          | Subject387 |          |          |
|----------------|------------|----------|----------|------------|----------|----------|------------|----------|----------|
|                | PSNR↑      | SSIM↑    | †LPIPS↓  | PSNR↑      | SSIM↑    | †LPIPS↓  | PSNR↑      | SSIM↑    | †LPIPS↓  |
| Ani-NeRF [40]  | 22.12      | 0.8790   | 51.796   | 23.92      | 0.8545   | 55.697   | 16.26      | 0.7850   | 89.790   |
| HumanNeRF [56] | 30.74      | 0.9795   | 17.387   | 33.46      | 0.9716   | 36.326   | 30.30      | 0.9768 ● | 20.010 ● |
| MonoHuman [62] | 31.82 ●    | 0.9822   | 17.561   | 30.10      | 0.9561   | 69.107   | 30.43 ●    | 0.9755   | 23.954   |
| Ours           | 31.34      | 0.9826 ● | 15.129 ● | 33.80 ●    | 0.9741 ● | 32.990 ● | 29.36      | 0.9742   | 21.462   |

  

| Methods        | Subject392 |          |          | Subject393 |          |          | Subject394 |          |          |
|----------------|------------|----------|----------|------------|----------|----------|------------|----------|----------|
|                | PSNR↑      | SSIM↑    | †LPIPS↓  | PSNR↑      | SSIM↑    | †LPIPS↓  | PSNR↑      | SSIM↑    | †LPIPS↓  |
| Ani-NeRF [40]  | 22.78      | 0.8610   | 67.744   | 20.37      | 0.8417   | 75.381   | 22.05      | 0.8537   | 69.188   |
| HumanNeRF [56] | 31.80      | 0.9743   | 26.811   | 29.80 ●    | 0.9708 ● | 25.615   | 30.85      | 0.9702   | 22.783 ● |
| MonoHuman [62] | 32.06 ●    | 0.9749 ● | 27.043   | 29.69      | 0.9701   | 26.570   | 31.37 ●    | 0.9720 ● | 23.521   |
| Ours           | 31.75      | 0.9740   | 25.537 ● | 29.50      | 0.9642   | 25.462 ● | 30.81      | 0.9697   | 23.929   |

Table 9. **Comparison of few-shot input results on ZJU-MOCAP.** On the most important metric LPIPS, our method demonstrates the best results. our method exhibits less performance degradation with few-shot input indicates that our method does not overly rely on data to fit the model, unlike previous methods.

| Methods        | Subject377 |          |          | Subject386 |          |          | Subject387 |          |          |
|----------------|------------|----------|----------|------------|----------|----------|------------|----------|----------|
|                | PSNR↑      | SSIM↑    | †LPIPS↓  | PSNR↑      | SSIM↑    | †LPIPS↓  | PSNR↑      | SSIM↑    | †LPIPS↓  |
| Ani-NeRF [40]  | 21.77      | 0.8313   | 66.532   | 24.48      | 0.8386   | 74.342   | 20.74      | 0.8279   | 65.747   |
| HumanNeRF [56] | 30.33      | 0.9799   | 18.510   | 31.47      | 0.9618   | 48.410   | 27.92      | 0.9610   | 39.941   |
| MonoHuman [62] | 31.02      | 0.9774   | 22.562   | 31.26      | 0.9601   | 56.916   | 28.5 ●     | 0.9619 ● | 43.147   |
| Ours           | 31.07 ●    | 0.9806 ● | 18.484 ● | 32.44 ●    | 0.9644 ● | 43.876 ● | 28.05      | 0.9612   | 39.733 ● |

  

| Methods        | Subject392 |          |          | Subject393 |          |          | Subject394 |          |          |
|----------------|------------|----------|----------|------------|----------|----------|------------|----------|----------|
|                | PSNR↑      | SSIM↑    | †LPIPS↓  | PSNR↑      | SSIM↑    | †LPIPS↓  | PSNR↑      | SSIM↑    | †LPIPS↓  |
| Ani-NeRF [40]  | 22.49      | 0.8433   | 61.917   | 21.96      | 0.8384   | 59.169   | 21.65      | 0.8240   | 61.328   |
| HumanNeRF [56] | 31.55 ●    | 0.9747 ● | 28.043   | 29.45 ●    | 0.9694 ● | 26.930 ● | 28.66      | 0.9629   | 36.507   |
| MonoHuman [62] | 31.48      | 0.9739   | 30.090   | 29.45 ●    | 0.9691   | 30.113   | 28.86 ●    | 0.9636 ● | 36.139   |
| Ours           | 31.36      | 0.9734   | 27.604 ● | 29.25      | 0.9681   | 27.328   | 28.51      | 0.9626   | 35.479 ● |

Table 10. **Comparison of results on the IN-THE-WILD DATA.** Since IN-THE-WILD DATA is not captured in laboratory conditions and only contains monocular information, the accuracy of SMPL estimation is lower compared to ZJU-MOCAP, which leads to a decrease in overall performance metrics. However, this is more in line with real-world application scenarios. Our method demonstrates the best performance, especially in the LPIPS metric, which reflects image quality the most. Even with reduced input data, our method maintains excellent performance, while other methods experience a greater degree of decline.

| Full Input     | S1      |          |          | S2      |          |          | S3      |          |          |
|----------------|---------|----------|----------|---------|----------|----------|---------|----------|----------|
|                | PSNR↑   | SSIM↑    | †LPIPS↓  | PSNR↑   | SSIM↑    | †LPIPS↓  | PSNR↑   | SSIM↑    | †LPIPS↓  |
| HumanNeRF [56] | 32.94   | 0.9737   | 43.259   | 26.65   | 0.9650   | 41.505   | 27.32   | 0.9500   | 59.620   |
| MonoHuman [62] | 32.99   | 0.9725   | 46.272   | 26.74   | 0.9683   | 42.198   | 27.72 ● | 0.9509   | 66.400   |
| Ours           | 33.72 ● | 0.9764 ● | 42.343 ● | 26.43 ● | 0.9709 ● | 39.174 ● | 27.54   | 0.9524 ● | 57.408 ● |

  

| Few-shot Input | S1      |          |          | S2      |          |          | S3      |          |          |
|----------------|---------|----------|----------|---------|----------|----------|---------|----------|----------|
|                | PSNR↑   | SSIM↑    | †LPIPS↓  | PSNR↑   | SSIM↑    | †LPIPS↓  | PSNR↑   | SSIM↑    | †LPIPS↓  |
| HumanNeRF [56] | 33.37   | 0.9761   | 45.012   | 25.82   | 0.9599   | 43.326   | 27.27   | 0.9495   | 62.384   |
| MonoHuman [62] | 33.58   | 0.9744   | 50.561   | 26.57 ● | 0.9640   | 45.955   | 27.48   | 0.9522   | 72.143   |
| Ours           | 33.70 ● | 0.9768 ● | 41.954 ● | 26.45   | 0.9712 ● | 39.894 ● | 27.62 ● | 0.9525 ● | 59.636 ● |
